# Supplementary material
Source: bioRxiv or medRxiv preprint supplement (https://www.biorxiv.org/highwire/filestream/130491/field_highwire_adjunct_files/3/434654-12.pdf)
Supplement: Supplementary file [file 434654-12.pdf]

1 **Table S11.** Statistics of the “Physical and microbial data” model (i.e.  $\log(R_H)$  as a function of  
 2 Temperature, moisture, TMB,  $\log(\text{AMB})$ ,  $\log(\text{Fungi:Bacteria})$ , and  $\log(\text{Gram-positive:Gram-}$   
 3  $\text{negative})$ .  $P=0.001$ ,  $\text{BIC}=94.1$ . Significance codes:  $0.01 < P < 0.05$  ‘\*’,  $0.05 < P < 0.1$  ‘†’.

4

|                      | <b>Estimate</b> | <b>Std. Error</b> | <b>t-value</b> | <b>P</b> |
|----------------------|-----------------|-------------------|----------------|----------|
| (Intercept)          | - 0.45742       | 1.18401           | - 0.386        | 0.701    |
| Temp                 | 0.07490         | 0.03052           | 2.454          | 0.018*   |
| Moisture             | - 0.42590       | 1.48517           | - 0.287        | 0.776    |
| TMB                  | - 0.76735       | 0.90625           | - 0.847        | 0.402    |
| $\log(\text{AMB})$   | 0.14306         | 0.07506           | 1.906          | 0.063 †  |
| $\log(\text{F:B})$   | -0.04478        | 0.11833           | -0.378         | 0.707    |
| $\log(\text{G+:G-})$ | -0.25221        | 0.31209           | -0.808         | 0.423    |
